# Supplementary material for: Hypoadrenocorticism in a Dog Following Recovery from Alpha-Amanitin Intoxication
Source: MDPI journal article supplement (doi:10.3390/vetsci10080500), 2023-08-03
Supplement: s1 [file s1]

Table S1: Clinicopathologic parameters throughout the initial hospitalization (days 1-8), recheck examinations (day 15 & 50) and secondary hospitalization (days 24-26) of a dog that recovered from acute liver insufficiency due to amanita intoxication and subsequently developed hypoadrenocorticism.

|                        | Reference interval | Day 1                | Day 2  | Day 3 | Day 4 | Day 5 | Day 6                 | Day 7 | Day 8 | Day 15 | Day 24               | Day 25 | Day 26 | Day 34 | Day 50 |
|------------------------|--------------------|----------------------|--------|-------|-------|-------|-----------------------|-------|-------|--------|----------------------|--------|--------|--------|--------|
| Hematocrit (%)         | 50-55              | 62.3                 | 60.6   |       |       |       | 55.3                  |       |       |        | 56.9                 |        |        |        |        |
| Neutrophils (cells/uL) | 3,000 – 10,500     | 8,847                |        |       |       |       | 8,204                 |       |       |        | 6,261                |        |        |        |        |
| Lymphocytes (cells/uL) | 1,200 – 4,000      | 2,181                |        |       |       |       | 1,875                 |       |       |        | 3,010                |        |        |        |        |
| Eosinophils (cells/uL) | 0 – 1,500          | 485                  |        |       |       |       | 527                   |       |       |        | 1,806                |        |        |        |        |
| Platelets (cells/uL)   | 150,000 – 400,000  | 70,000 (clumps seen) |        |       |       |       | 126,000 (clumps seen) |       |       |        | 34,000 (clumps seen) |        |        |        |        |
| Sodium (mmol/L)        | 143-151            | 148                  |        |       | 145   | 151   |                       |       |       |        | 131                  |        | 134    | 154    | 152    |
| Potassium (mmol/L)     | 3.6-4.8            | 4.4                  |        |       | 4.5   | 4.7   |                       |       |       |        | 5.6                  |        | 5.5    | 4.0    | 3.9    |
| ALT (IU/L)             | 21 – 72            | 13,288               | 10,343 | 6,007 | 4,103 | 3,270 | 2,555                 | 1,993 | 1,674 | 214    | 85                   |        | 69     | 174    | 108    |
| AST (IU/L)             | 20 – 49            | 1,830                | 467    | 167   | 135   | 110   | 73                    | 69    | 73    | 33     | 84                   |        | 50     | 40     | 26     |
| ALP (IU/L)             | 14 – 91            | 1,508                | 1,783  | 1,567 | 1,387 | 1,502 | 1,509                 | 1,465 | 1,550 | 893    | 447                  |        | 356    | 968    | 353    |
| GGT (IU/L)             | 0 – 5              | 17                   | 18     | 13    | 8     | 11    | 20                    | 5     | 7     | <3     | <3                   |        | <3     | <3     | <3     |
| Albumin (g/dL)         | 3.4 – 4.3          | 3.3                  | 3.3    | 3     | 2.6   | 2.8   | 2.9                   | 3.1   | 3.3   | 3.7    | 3.3                  |        | 3.1    | 3.3    | 3.7    |
| Globulin (g/dL)        | 1.7 – 3.1          | 1.6                  | 2.1    | 1.9   | 1.9   | 2.2   | 2.4                   | 2.5   | 2.9   | 2.5    | 2.6                  |        | 2.1    | 2.0    | 2.3    |
| Cholesterol (mg/dL)    | 139 – 353          | 188                  | 193    | 137   | 105   | 101   | 99                    | 99    | 104   | 100    | 78                   |        | 68     | 106    | 164    |

|                                                 |             |       |     |     |     |     |      |     |      |      |     |  |     |      |      |
|-------------------------------------------------|-------------|-------|-----|-----|-----|-----|------|-----|------|------|-----|--|-----|------|------|
| Total Bilirubin<br>(mg/dL)                      | 0.0 – 0.2   | 1.4   | 2.1 | 1.4 | 0.9 | 0.6 | 0.5  | 0.5 | 0.5  | 0.2  | 0.3 |  | 0.2 | <0.2 | <0.2 |
| Glucose<br>(mg/dL)                              | 86 – 118    | 73    | 87  | 74  | 149 | 82  | 90   | 63  | 51   | 91   | 43  |  | 120 | 117  | 114  |
| Creatinine<br>(mg/dL)                           | 0.8 – 1.5   | 0.8   |     |     | 0.7 | 0.9 |      |     |      |      | 0.8 |  | 0.6 | 0.6  |      |
| Blood Urea<br>Nitrogen<br>(mg/dL)               | 11 – 33     | 17    | 9   | 5   | 4   | 8   | 10   | 10  | 15   | 39   | 28  |  | 19  | 7    | 8    |
| PT (secs)                                       | 7.0 – 9.3   | 21.4  |     |     |     |     | 9.9  |     | 8.2  | 8.3  |     |  |     |      |      |
| aPTT (secs)                                     | 10.4 – 12.9 | 21    |     |     |     |     | 15.7 |     | 13.9 | 15.2 |     |  |     |      |      |
| Fibrinogen<br>(mg/dL)                           | 109 – 311   | <50   |     |     |     |     | 119  |     | 210  | 160  |     |  |     |      |      |
| D-dimers<br>(ng/dL)                             | 0 – 186     | 904   |     |     |     |     | 58   |     | 181  | 72   |     |  |     |      |      |
| Aldosterone<br>(pmol/L)                         | 14 – 957    | 42*   |     |     |     |     |      |     |      |      |     |  |     |      |      |
| Resting cortisol<br>(ug/dL)                     | 0.0 – 6.0   | 2.0 * |     |     |     |     |      |     |      |      |     |  | 0.4 |      |      |
| Post ACTH<br>stimulation<br>cortisol<br>(ug/dL) | 0.0 – 6.0   |       |     |     |     |     |      |     |      |      |     |  | 0.4 |      |      |

\*Analytes measured retrospectively on a citrated plasma sample stored at -80°C.
